# Supplementary material for: Physical Exercise on Inflammatory Markers in Type 2 Diabetes Patients: A Systematic Review of Randomized Controlled Trials
Source: Hindawi journal article supplement (doi:10.1155/2017/8523728), 2017-01-01

# Flow Diagram – PRISMA Statement

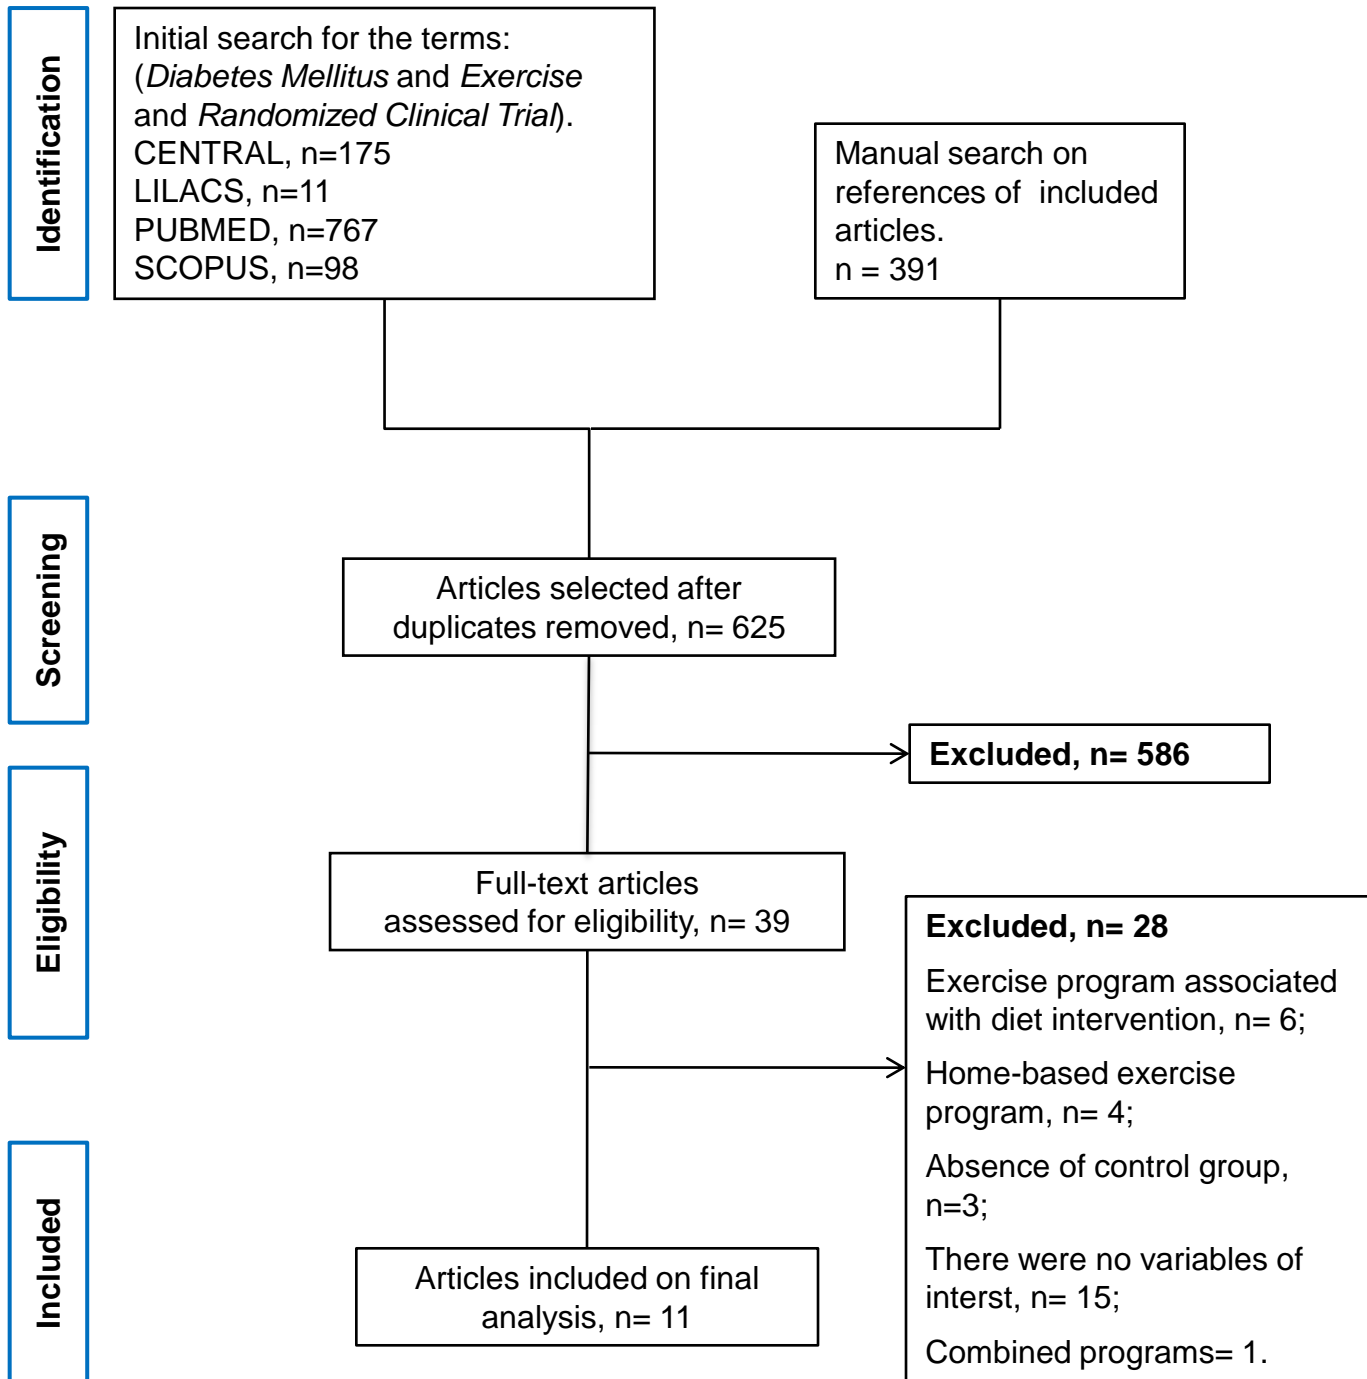

Supplement: f1 [file 8523728.f1.pdf]
